# Supplementary material
Source: publisher figshare collection journal article supplement (https://tandf.figshare.com/ndownloader/files/15445469)
Supplement: Supplementary file 1 [file 15445469]

## Eclalbasaponin I causes mitophagy to repress oxidative stress-induced apoptosis via activation of p38 and ERK in SH-SY5Y cells

Wei Wang<sup>1,2+</sup> • Guo-Dong Yao<sup>1,2+</sup> • Xin-Yue Shang<sup>1,2</sup> • Ying-Ying Zhang<sup>1,2</sup> • Xiao-Yu Song<sup>1,2</sup> • Toshihiko Hayashi<sup>3,4</sup> • Yan Zhang<sup>1,2\*</sup> • Shao-Jiang Song<sup>1,2\*</sup>

<sup>1</sup>School of Traditional Chinese Materia Medica, Shenyang Pharmaceutical University, Shenyang 110016, People's Republic of China

<sup>2</sup>Key Laboratory of Structure-Based Drug Design and Discovery, Ministry of Education, Shenyang Pharmaceutical University, Shenyang 110016, People's Republic of China

<sup>3</sup>China-Japan Research Institute of Medical and Pharmaceutical Sciences, Wuya College of Innovation, Shenyang Pharmaceutical University, Shenyang 110016, China

<sup>4</sup>Department of Chemistry and Life Science, School of Advanced Engineering, Kogakuin University, 2665-1, Nakanomachi, Hachioji, Tokyo, 192-0015, Japan

Correspondence author.

E-mail: songsj99@163.com, (Shao-Jiang Song)

zhangyan\_929@yeah.net, (Yan Zhang)

\*these authors contributed equally to this work

### Supporting Information

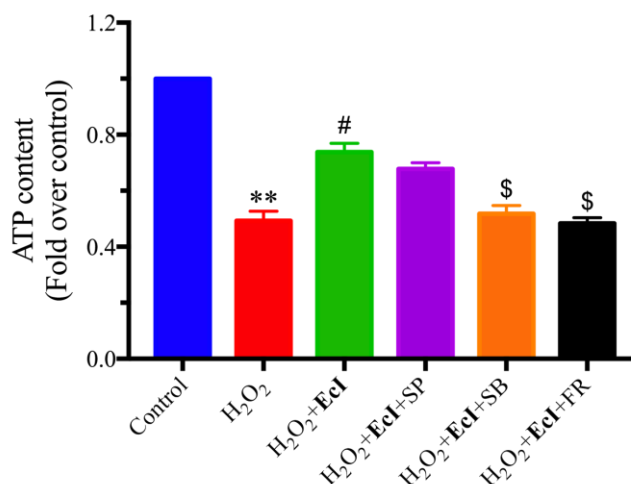

**Figure S1.** Cells were pre-treated with SP, SB or FR and cultured with Ecl (50  $\mu$ M) prior to 200  $\mu$ M H<sub>2</sub>O<sub>2</sub>. The ATP levels were quantified in SH-SY5Y cells. Data are presented as means  $\pm$  S.D. (n=3). \*\* $p$ <0.01 vs. control group, # $p$ <0.05 vs. H<sub>2</sub>O<sub>2</sub> treated group. \$ $p$ <0.05 vs. (Ecl, 50  $\mu$ M + H<sub>2</sub>O<sub>2</sub>, 200  $\mu$ M) group.

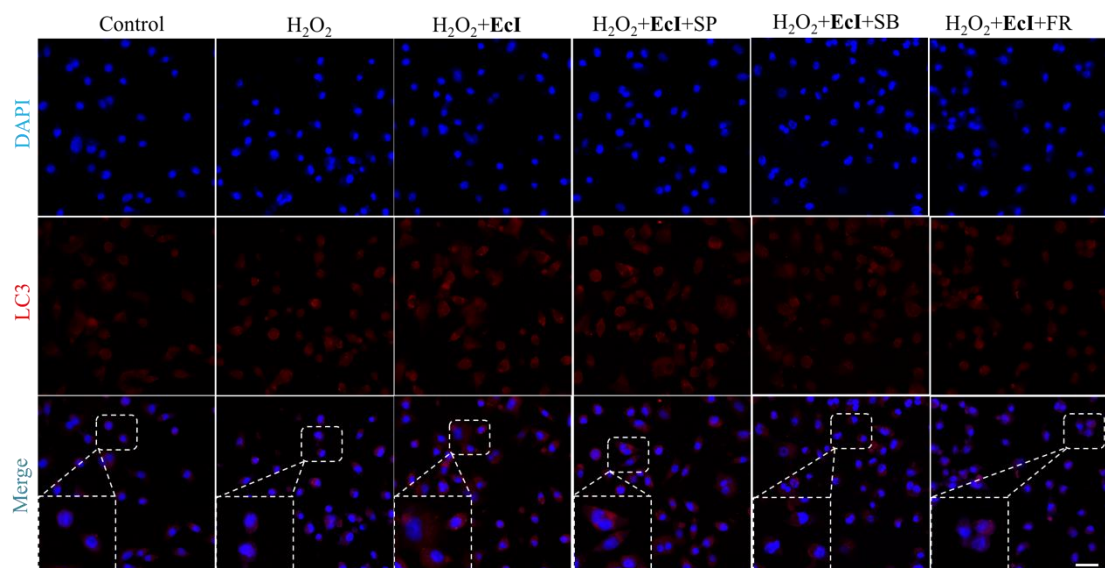

**Figure S2.** Cells were pre-treated with SP, SB or FR and cultured with Ecl (50  $\mu$ M) prior to 200  $\mu$ M H<sub>2</sub>O<sub>2</sub>. The distribution of LC3 was investigated by immunofluorescence analysis. The scale bar represents 50  $\mu$ m.

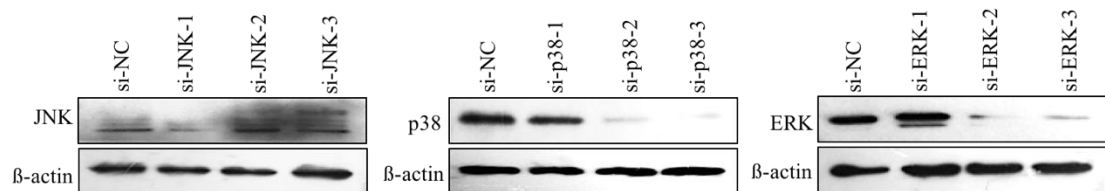

**Figure S3.** Cells were transfected with negative control siRNA (si-NC) or siRNA targeting JNK (si-JNK), p38 (si-p38), or ERK (si-ERK) followed by Western blot analysis. The specific sequences si-JNK-1, si-p38-3 and si-ERK-2 were used in following assays. NC means negative
